# Supplementary material for: Interfacial charge-transfer transitions enable photovoltaic conversion with CO2-fixation products
Source: Royal Society of Chemistry journal article supplement (doi:10.1039/d4cc01457j), 2024-01-01
Supplement: d4cc01457j1.pdf [file d4cc01457j1.pdf]

Electronic Supplementary Information

## Interfacial charge-transfer transitions enable photovoltaic conversion with CO<sub>2</sub>-fixation products

Jun-ichi Fujisawa,\* Shunsuke Kato and Minoru Hanaya

Graduate School of Science and Technology, Gunma University, 1-5-1 Tenjin-cho, Kiryu, Gunma, 376-8515, Japan.

\*E-mail: [jfujisawa@gunma-u.ac.jp](mailto:jfujisawa@gunma-u.ac.jp)

Here, we present the experimental data in Fig. 2, Fig. 3 and Fig. 4.

Table 1. Experimental data of the IPCE spectra in Fig. 2(b).

| Wavelength (nm) | IPCE_TiO <sub>2</sub> -BA(OMe) <sub>2</sub> (%) | IPCE_TiO <sub>2</sub> -BANH <sub>2</sub> (%) | IPCE_TiO <sub>2</sub> -BANMe <sub>2</sub> (%) |
|-----------------|-------------------------------------------------|----------------------------------------------|-----------------------------------------------|
| 800             | -0.01917                                        | -0.03091                                     | -0.02952                                      |
| 790             | -0.02797                                        | -0.03499                                     | -0.03343                                      |
| 780             | -0.03215                                        | -0.0362                                      | -0.03106                                      |
| 770             | -0.0339                                         | -0.03591                                     | -0.02536                                      |
| 760             | -0.03403                                        | -0.03896                                     | -0.01848                                      |
| 750             | -0.03522                                        | -0.04141                                     | -0.007625                                     |
| 740             | -0.04717                                        | -0.04269                                     | 0.01184                                       |
| 730             | -0.08379                                        | -0.0427                                      | 0.04438                                       |
| 720             | -0.09573                                        | -0.04324                                     | 0.09353                                       |
| 710             | -0.1004                                         | -0.04292                                     | 0.1676                                        |
| 700             | -0.1009                                         | -0.04329                                     | 0.2813                                        |
| 690             | -0.101                                          | -0.04204                                     | 0.4533                                        |
| 680             | -0.09417                                        | -0.04653                                     | 0.6668                                        |
| 670             | -0.06574                                        | 0.01532                                      | 1.067                                         |
| 660             | -0.07862                                        | -0.01172                                     | 1.499                                         |
| 650             | -0.08443                                        | -0.007337                                    | 2.116                                         |
| 640             | -0.08969                                        | 0.01021                                      | 2.95                                          |
| 630             | -0.09403                                        | 0.04186                                      | 4.054                                         |
| 620             | -0.1048                                         | 0.0927                                       | 5.443                                         |
| 610             | -0.1203                                         | 0.1757                                       | 7.207                                         |
| 600             | -0.1243                                         | 0.3166                                       | 9.461                                         |
| 590             | -0.1184                                         | 0.5653                                       | 12.22                                         |
| 580             | -0.1143                                         | 0.9297                                       | 15.52                                         |
| 570             | -0.1095                                         | 1.533                                        | 19.42                                         |

|     |          |       |       |
|-----|----------|-------|-------|
| 560 | -0.1022  | 2.465 | 23.93 |
| 550 | -0.09058 | 3.82  | 28.78 |
| 540 | -0.06607 | 5.632 | 33.99 |
| 530 | -0.01333 | 8.025 | 39.61 |
| 520 | 0.09625  | 11.14 | 44.79 |
| 510 | 0.3418   | 14.96 | 50.15 |
| 500 | 0.9369   | 19.35 | 55.22 |
| 490 | 1.939    | 24.03 | 59.33 |
| 480 | 3.51     | 28.62 | 62.64 |
| 470 | 5.661    | 32.63 | 65.01 |
| 460 | 7.911    | 36.07 | 66.74 |
| 450 | 10.94    | 39.26 | 68.39 |
| 440 | 14.54    | 42.12 | 69.59 |
| 430 | 18.21    | 44.16 | 70.08 |
| 420 | 21.54    | 45.34 | 69.92 |
| 410 | 24.08    | 45.48 | 68.93 |
| 400 | 25.87    | 44.72 | 67.76 |
| 390 | 27.28    | 43.29 | 65.65 |
| 380 | 31.16    | 42.54 | 62.95 |
| 370 | 34.15    | 42.71 | 60.53 |
| 360 | 39.27    | 44.45 | 60.37 |
| 350 | 42.99    | 44.72 | 58.33 |
| 340 | 41.64    | 40.36 | 50.95 |
| 330 | 34.76    | 31.65 | 38.95 |
| 320 | 23.83    | 20.17 | 24.4  |
| 310 | 12.63    | 9.449 | 11.41 |
| 300 | 4.096    | 2.012 | 2.691 |

Table 2. Experimental data of the  $J$ - $V$  curves in Fig. 2(c).

| $V_{\text{TiO}_2\text{-BA}}(\text{OMe})_2$ (V) | $J_{\text{TiO}_2\text{-BA}(\text{OMe})_2}$ (mA/cm <sup>2</sup> ) | $V_{\text{TiO}_2\text{-BANH}_2}$ (V) | $J_{\text{TiO}_2\text{-BANH}_2}$ (mA/cm <sup>2</sup> ) | $V_{\text{TiO}_2\text{-BANMe}_2}$ (V) | $J_{\text{TiO}_2\text{-BANMe}_2}$ (mA/cm <sup>2</sup> ) |
|------------------------------------------------|------------------------------------------------------------------|--------------------------------------|--------------------------------------------------------|---------------------------------------|---------------------------------------------------------|
| 0.499                                          | -1.31                                                            | 0.499                                | -0.626                                                 | 0.499                                 | -1.98                                                   |
| 0.495                                          | -1.16                                                            | 0.495                                | -0.437                                                 | 0.495                                 | -1.78                                                   |
| 0.491                                          | -1.04                                                            | 0.491                                | -0.277                                                 | 0.491                                 | -1.6                                                    |
| 0.487                                          | -0.933                                                           | 0.487                                | -0.133                                                 | 0.487                                 | -1.42                                                   |
| 0.483                                          | -0.833                                                           | 0.483                                | 0.00495                                                | 0.483                                 | -1.23                                                   |
| 0.479                                          | -0.741                                                           | 0.479                                | 0.141                                                  | 0.479                                 | -1.06                                                   |
| 0.475                                          | -0.654                                                           | 0.475                                | 0.273                                                  | 0.475                                 | -0.875                                                  |
| 0.471                                          | -0.575                                                           | 0.471                                | 0.401                                                  | 0.471                                 | -0.7                                                    |
| 0.467                                          | -0.5                                                             | 0.467                                | 0.521                                                  | 0.467                                 | -0.527                                                  |
| 0.463                                          | -0.424                                                           | 0.463                                | 0.639                                                  | 0.463                                 | -0.356                                                  |
| 0.459                                          | -0.358                                                           | 0.459                                | 0.753                                                  | 0.459                                 | -0.185                                                  |
| 0.455                                          | -0.293                                                           | 0.455                                | 0.863                                                  | 0.455                                 | -0.0129                                                 |
| 0.451                                          | -0.234                                                           | 0.451                                | 0.964                                                  | 0.451                                 | 0.154                                                   |
| 0.447                                          | -0.175                                                           | 0.447                                | 1.07                                                   | 0.447                                 | 0.322                                                   |
| 0.443                                          | -0.122                                                           | 0.443                                | 1.16                                                   | 0.443                                 | 0.482                                                   |
| 0.439                                          | -0.0737                                                          | 0.439                                | 1.25                                                   | 0.439                                 | 0.646                                                   |
| 0.435                                          | -0.0247                                                          | 0.435                                | 1.34                                                   | 0.435                                 | 0.806                                                   |
| 0.431                                          | 0.0217                                                           | 0.431                                | 1.42                                                   | 0.431                                 | 0.962                                                   |
| 0.427                                          | 0.0555                                                           | 0.427                                | 1.5                                                    | 0.427                                 | 1.12                                                    |
| 0.423                                          | 0.0946                                                           | 0.423                                | 1.58                                                   | 0.423                                 | 1.27                                                    |
| 0.419                                          | 0.133                                                            | 0.419                                | 1.65                                                   | 0.419                                 | 1.42                                                    |
| 0.415                                          | 0.167                                                            | 0.415                                | 1.72                                                   | 0.415                                 | 1.57                                                    |
| 0.411                                          | 0.195                                                            | 0.411                                | 1.78                                                   | 0.411                                 | 1.71                                                    |
| 0.407                                          | 0.231                                                            | 0.407                                | 1.84                                                   | 0.407                                 | 1.86                                                    |
| 0.403                                          | 0.252                                                            | 0.403                                | 1.89                                                   | 0.403                                 | 2                                                       |
| 0.399                                          | 0.276                                                            | 0.399                                | 1.94                                                   | 0.399                                 | 2.13                                                    |
| 0.395                                          | 0.298                                                            | 0.395                                | 1.99                                                   | 0.395                                 | 2.27                                                    |
| 0.391                                          | 0.319                                                            | 0.391                                | 2.04                                                   | 0.391                                 | 2.4                                                     |
| 0.387                                          | 0.337                                                            | 0.387                                | 2.08                                                   | 0.387                                 | 2.52                                                    |
| 0.383                                          | 0.357                                                            | 0.383                                | 2.12                                                   | 0.383                                 | 2.65                                                    |
| 0.379                                          | 0.372                                                            | 0.379                                | 2.15                                                   | 0.379                                 | 2.77                                                    |
| 0.375                                          | 0.394                                                            | 0.375                                | 2.19                                                   | 0.375                                 | 2.89                                                    |
| 0.371                                          | 0.404                                                            | 0.371                                | 2.22                                                   | 0.371                                 | 3.01                                                    |
| 0.367                                          | 0.426                                                            | 0.367                                | 2.24                                                   | 0.367                                 | 3.12                                                    |

|       |       |       |      |       |      |
|-------|-------|-------|------|-------|------|
| 0.363 | 0.431 | 0.363 | 2.27 | 0.363 | 3.22 |
| 0.359 | 0.442 | 0.359 | 2.3  | 0.359 | 3.33 |
| 0.355 | 0.454 | 0.355 | 2.32 | 0.355 | 3.43 |
| 0.351 | 0.465 | 0.351 | 2.34 | 0.351 | 3.52 |
| 0.347 | 0.478 | 0.347 | 2.36 | 0.347 | 3.62 |
| 0.343 | 0.485 | 0.343 | 2.38 | 0.343 | 3.71 |
| 0.339 | 0.494 | 0.339 | 2.39 | 0.339 | 3.8  |
| 0.335 | 0.504 | 0.335 | 2.41 | 0.335 | 3.88 |
| 0.331 | 0.511 | 0.331 | 2.43 | 0.331 | 3.96 |
| 0.327 | 0.516 | 0.327 | 2.44 | 0.327 | 4.04 |
| 0.323 | 0.527 | 0.323 | 2.45 | 0.323 | 4.11 |
| 0.319 | 0.535 | 0.319 | 2.46 | 0.319 | 4.18 |
| 0.315 | 0.539 | 0.315 | 2.48 | 0.315 | 4.24 |
| 0.311 | 0.544 | 0.311 | 2.49 | 0.311 | 4.31 |
| 0.307 | 0.553 | 0.307 | 2.5  | 0.307 | 4.37 |
| 0.303 | 0.558 | 0.303 | 2.51 | 0.303 | 4.42 |
| 0.299 | 0.563 | 0.299 | 2.51 | 0.299 | 4.48 |
| 0.295 | 0.569 | 0.295 | 2.52 | 0.295 | 4.53 |
| 0.291 | 0.574 | 0.291 | 2.53 | 0.291 | 4.58 |
| 0.287 | 0.579 | 0.287 | 2.54 | 0.287 | 4.62 |
| 0.283 | 0.584 | 0.283 | 2.54 | 0.283 | 4.67 |
| 0.279 | 0.587 | 0.279 | 2.55 | 0.279 | 4.71 |
| 0.275 | 0.595 | 0.275 | 2.56 | 0.275 | 4.75 |
| 0.271 | 0.599 | 0.271 | 2.57 | 0.271 | 4.78 |
| 0.267 | 0.6   | 0.267 | 2.57 | 0.267 | 4.82 |
| 0.263 | 0.608 | 0.263 | 2.58 | 0.263 | 4.85 |
| 0.259 | 0.609 | 0.259 | 2.58 | 0.259 | 4.88 |
| 0.255 | 0.614 | 0.255 | 2.59 | 0.255 | 4.91 |
| 0.251 | 0.618 | 0.251 | 2.59 | 0.251 | 4.94 |
| 0.247 | 0.62  | 0.247 | 2.6  | 0.247 | 4.97 |
| 0.243 | 0.622 | 0.243 | 2.6  | 0.243 | 4.99 |
| 0.239 | 0.627 | 0.239 | 2.61 | 0.239 | 5.02 |
| 0.235 | 0.632 | 0.235 | 2.61 | 0.235 | 5.04 |
| 0.231 | 0.634 | 0.231 | 2.62 | 0.231 | 5.06 |
| 0.227 | 0.637 | 0.227 | 2.62 | 0.227 | 5.08 |
| 0.223 | 0.641 | 0.223 | 2.63 | 0.223 | 5.1  |
| 0.219 | 0.642 | 0.219 | 2.63 | 0.219 | 5.12 |

|        |       |        |      |        |      |
|--------|-------|--------|------|--------|------|
| 0.215  | 0.645 | 0.215  | 2.63 | 0.215  | 5.13 |
| 0.211  | 0.649 | 0.211  | 2.64 | 0.211  | 5.15 |
| 0.207  | 0.65  | 0.207  | 2.64 | 0.207  | 5.17 |
| 0.203  | 0.652 | 0.203  | 2.64 | 0.203  | 5.18 |
| 0.199  | 0.655 | 0.199  | 2.65 | 0.199  | 5.19 |
| 0.195  | 0.659 | 0.195  | 2.65 | 0.195  | 5.21 |
| 0.191  | 0.661 | 0.191  | 2.65 | 0.191  | 5.22 |
| 0.187  | 0.663 | 0.187  | 2.66 | 0.187  | 5.24 |
| 0.183  | 0.666 | 0.183  | 2.66 | 0.183  | 5.24 |
| 0.179  | 0.668 | 0.179  | 2.67 | 0.179  | 5.26 |
| 0.175  | 0.669 | 0.175  | 2.67 | 0.175  | 5.27 |
| 0.171  | 0.672 | 0.171  | 2.67 | 0.171  | 5.27 |
| 0.167  | 0.675 | 0.167  | 2.67 | 0.167  | 5.28 |
| 0.163  | 0.675 | 0.163  | 2.67 | 0.163  | 5.3  |
| 0.159  | 0.677 | 0.159  | 2.68 | 0.159  | 5.3  |
| 0.155  | 0.68  | 0.155  | 2.68 | 0.155  | 5.31 |
| 0.151  | 0.68  | 0.151  | 2.68 | 0.151  | 5.32 |
| 0.147  | 0.681 | 0.147  | 2.69 | 0.147  | 5.32 |
| 0.143  | 0.685 | 0.143  | 2.69 | 0.143  | 5.33 |
| 0.139  | 0.688 | 0.139  | 2.69 | 0.139  | 5.34 |
| 0.135  | 0.688 | 0.135  | 2.69 | 0.135  | 5.35 |
| 0.131  | 0.691 | 0.131  | 2.7  | 0.131  | 5.35 |
| 0.127  | 0.692 | 0.127  | 2.7  | 0.127  | 5.36 |
| 0.123  | 0.695 | 0.123  | 2.7  | 0.123  | 5.36 |
| 0.119  | 0.695 | 0.119  | 2.7  | 0.119  | 5.37 |
| 0.115  | 0.697 | 0.115  | 2.71 | 0.115  | 5.37 |
| 0.111  | 0.699 | 0.111  | 2.71 | 0.111  | 5.38 |
| 0.107  | 0.7   | 0.107  | 2.71 | 0.107  | 5.38 |
| 0.103  | 0.702 | 0.103  | 2.71 | 0.103  | 5.39 |
| 0.0989 | 0.702 | 0.0988 | 2.71 | 0.0988 | 5.39 |
| 0.0948 | 0.704 | 0.0948 | 2.72 | 0.0948 | 5.39 |
| 0.0908 | 0.707 | 0.0908 | 2.72 | 0.0908 | 5.4  |
| 0.0869 | 0.705 | 0.0868 | 2.72 | 0.0869 | 5.4  |
| 0.0829 | 0.706 | 0.0827 | 2.73 | 0.0829 | 5.4  |
| 0.0788 | 0.707 | 0.0788 | 2.72 | 0.0789 | 5.4  |
| 0.0748 | 0.709 | 0.0748 | 2.73 | 0.0748 | 5.41 |
| 0.0708 | 0.712 | 0.0708 | 2.73 | 0.0709 | 5.41 |

|          |       |          |      |          |      |
|----------|-------|----------|------|----------|------|
| 0.0668   | 0.713 | 0.0668   | 2.73 | 0.0668   | 5.42 |
| 0.0628   | 0.712 | 0.0628   | 2.73 | 0.0629   | 5.42 |
| 0.0588   | 0.715 | 0.0588   | 2.74 | 0.0588   | 5.42 |
| 0.0548   | 0.717 | 0.0548   | 2.74 | 0.0548   | 5.42 |
| 0.0508   | 0.717 | 0.0508   | 2.74 | 0.0509   | 5.42 |
| 0.0468   | 0.718 | 0.0468   | 2.74 | 0.0467   | 5.43 |
| 0.0428   | 0.72  | 0.0428   | 2.74 | 0.0429   | 5.43 |
| 0.0388   | 0.72  | 0.0388   | 2.74 | 0.0389   | 5.43 |
| 0.0348   | 0.722 | 0.0347   | 2.75 | 0.0349   | 5.43 |
| 0.0308   | 0.723 | 0.0308   | 2.75 | 0.0308   | 5.43 |
| 0.0268   | 0.725 | 0.0268   | 2.75 | 0.0269   | 5.43 |
| 0.0227   | 0.726 | 0.0228   | 2.75 | 0.0229   | 5.44 |
| 0.0188   | 0.726 | 0.0187   | 2.76 | 0.0188   | 5.44 |
| 0.0148   | 0.726 | 0.0148   | 2.75 | 0.0148   | 5.44 |
| 0.0108   | 0.729 | 0.0107   | 2.75 | 0.0108   | 5.44 |
| 0.0067   | 0.731 | 0.0067   | 2.76 | 0.00679  | 5.44 |
| 0.00283  | 0.728 | 0.00282  | 2.76 | 0.00284  | 5.44 |
| -0.00125 | 0.733 | -0.00125 | 2.76 | -0.0012  | 5.44 |
| -0.00525 | 0.733 | -0.00529 | 2.76 | -0.0052  | 5.45 |
| -0.00919 | 0.732 | -0.00928 | 2.76 | -0.00921 | 5.45 |
| -0.0133  | 0.735 | -0.0133  | 2.76 | -0.0133  | 5.45 |
| -0.0173  | 0.737 | -0.0173  | 2.77 | -0.0172  | 5.45 |
| -0.0213  | 0.738 | -0.0213  | 2.77 | -0.0213  | 5.45 |
| -0.0253  | 0.742 | -0.0253  | 2.77 | -0.0252  | 5.45 |
| -0.0292  | 0.739 | -0.0294  | 2.78 | -0.0292  | 5.45 |
| -0.0333  | 0.74  | -0.0332  | 2.77 | -0.0332  | 5.45 |
| -0.0373  | 0.743 | -0.0373  | 2.77 | -0.0373  | 5.46 |
| -0.0412  | 0.745 | -0.0413  | 2.78 | -0.0412  | 5.46 |
| -0.0453  | 0.746 | -0.0452  | 2.78 | -0.0453  | 5.46 |

Table 3. Experimental data of the Kubelka-Munk (KM) spectra in Fig. 3(b).

| Wavelength (nm) | KM_TiO <sub>2</sub> _SA | KM_TiO <sub>2</sub> _SAOM<br>e | KM_TiO <sub>2</sub> _HNA |
|-----------------|-------------------------|--------------------------------|--------------------------|
| 1000            | 0.0101                  | 0.0103                         | 0.0105                   |
| 999             | 0.0102                  | 0.0103                         | 0.0105                   |
| 998             | 0.0102                  | 0.0103                         | 0.0106                   |
| 997             | 0.0102                  | 0.0102                         | 0.0105                   |
| 996             | 0.0101                  | 0.0102                         | 0.0105                   |
| 995             | 0.0102                  | 0.0102                         | 0.0105                   |
| 994             | 0.0102                  | 0.0101                         | 0.0105                   |
| 993             | 0.0101                  | 0.0102                         | 0.0105                   |
| 992             | 0.00982                 | 0.0102                         | 0.0105                   |
| 991             | 0.00976                 | 0.0102                         | 0.0105                   |
| 990             | 0.00971                 | 0.0102                         | 0.0104                   |
| 989             | 0.00976                 | 0.0102                         | 0.0104                   |
| 988             | 0.00971                 | 0.0102                         | 0.0104                   |
| 987             | 0.00981                 | 0.0102                         | 0.0104                   |
| 986             | 0.00982                 | 0.0101                         | 0.0103                   |
| 985             | 0.00995                 | 0.0101                         | 0.0105                   |
| 984             | 0.00996                 | 0.0101                         | 0.0103                   |
| 983             | 0.00989                 | 0.01                           | 0.0103                   |
| 982             | 0.00986                 | 0.00995                        | 0.0103                   |
| 981             | 0.00975                 | 0.00994                        | 0.0102                   |
| 980             | 0.00986                 | 0.00987                        | 0.0101                   |
| 979             | 0.00979                 | 0.00982                        | 0.0102                   |
| 978             | 0.00982                 | 0.0098                         | 0.0101                   |
| 977             | 0.00982                 | 0.00975                        | 0.0101                   |
| 976             | 0.00997                 | 0.00965                        | 0.0101                   |
| 975             | 0.01                    | 0.0096                         | 0.0101                   |
| 974             | 0.00995                 | 0.0096                         | 0.0101                   |
| 973             | 0.00989                 | 0.00964                        | 0.00995                  |
| 972             | 0.01                    | 0.00965                        | 0.00992                  |
| 971             | 0.00982                 | 0.00955                        | 0.00993                  |
| 970             | 0.0098                  | 0.00953                        | 0.00986                  |
| 969             | 0.00974                 | 0.00954                        | 0.00982                  |
| 968             | 0.00955                 | 0.00951                        | 0.00982                  |
| 967             | 0.00953                 | 0.00948                        | 0.00982                  |
| 966             | 0.00951                 | 0.00948                        | 0.00962                  |

|     |         |         |         |
|-----|---------|---------|---------|
| 965 | 0.00944 | 0.00942 | 0.00972 |
| 964 | 0.00942 | 0.00939 | 0.00977 |
| 963 | 0.00951 | 0.00943 | 0.00974 |
| 962 | 0.00952 | 0.00947 | 0.00984 |
| 961 | 0.0095  | 0.00944 | 0.00976 |
| 960 | 0.00941 | 0.00949 | 0.0097  |
| 959 | 0.00931 | 0.00952 | 0.00961 |
| 958 | 0.00948 | 0.00947 | 0.00957 |
| 957 | 0.00934 | 0.00938 | 0.0097  |
| 956 | 0.00924 | 0.00929 | 0.0097  |
| 955 | 0.00922 | 0.00932 | 0.00972 |
| 954 | 0.0092  | 0.00932 | 0.00973 |
| 953 | 0.00912 | 0.0093  | 0.00968 |
| 952 | 0.00919 | 0.00927 | 0.00964 |
| 951 | 0.0092  | 0.00924 | 0.00953 |
| 950 | 0.00916 | 0.00928 | 0.00977 |
| 949 | 0.00922 | 0.00923 | 0.00967 |
| 948 | 0.00913 | 0.00926 | 0.00968 |
| 947 | 0.00901 | 0.00924 | 0.00969 |
| 946 | 0.00883 | 0.00918 | 0.00956 |
| 945 | 0.00884 | 0.00917 | 0.00958 |
| 944 | 0.0088  | 0.00917 | 0.00957 |
| 943 | 0.0086  | 0.00917 | 0.00953 |
| 942 | 0.00854 | 0.00924 | 0.00961 |
| 941 | 0.00852 | 0.00923 | 0.00957 |
| 940 | 0.00836 | 0.00927 | 0.00952 |
| 939 | 0.00834 | 0.00926 | 0.00954 |
| 938 | 0.00837 | 0.00919 | 0.00952 |
| 937 | 0.00839 | 0.00916 | 0.00947 |
| 936 | 0.00828 | 0.00926 | 0.00942 |
| 935 | 0.00832 | 0.00925 | 0.0095  |
| 934 | 0.0083  | 0.00918 | 0.00924 |
| 933 | 0.00823 | 0.00922 | 0.00926 |
| 932 | 0.00834 | 0.00915 | 0.00919 |
| 931 | 0.00824 | 0.00907 | 0.0091  |
| 930 | 0.00823 | 0.00903 | 0.00906 |
| 929 | 0.00808 | 0.00898 | 0.00892 |



|     |         |         |         |
|-----|---------|---------|---------|
| 928 | 0.00801 | 0.00894 | 0.00886 |
| 927 | 0.00817 | 0.00888 | 0.00885 |
| 926 | 0.00808 | 0.00875 | 0.0088  |
| 925 | 0.00805 | 0.00881 | 0.00872 |
| 924 | 0.00817 | 0.00874 | 0.00872 |
| 923 | 0.00821 | 0.00876 | 0.0086  |
| 922 | 0.00816 | 0.00877 | 0.00861 |
| 921 | 0.00816 | 0.00877 | 0.0087  |
| 920 | 0.00808 | 0.00869 | 0.00867 |
| 919 | 0.00802 | 0.00875 | 0.00867 |
| 918 | 0.008   | 0.00873 | 0.00875 |
| 917 | 0.00806 | 0.00869 | 0.00873 |
| 916 | 0.00797 | 0.00869 | 0.00878 |
| 915 | 0.00791 | 0.00874 | 0.00878 |
| 914 | 0.00772 | 0.00878 | 0.00881 |
| 913 | 0.00775 | 0.00884 | 0.00894 |
| 912 | 0.00784 | 0.00886 | 0.00895 |
| 911 | 0.00774 | 0.00879 | 0.00898 |
| 910 | 0.00794 | 0.00878 | 0.00901 |
| 909 | 0.00792 | 0.00874 | 0.00911 |
| 908 | 0.00785 | 0.0087  | 0.00911 |
| 907 | 0.00795 | 0.0087  | 0.00908 |
| 906 | 0.00776 | 0.00868 | 0.00923 |
| 905 | 0.00761 | 0.00864 | 0.00914 |
| 904 | 0.00789 | 0.00869 | 0.00925 |
| 903 | 0.00799 | 0.00863 | 0.00928 |
| 902 | 0.00784 | 0.00866 | 0.00928 |
| 901 | 0.00789 | 0.00863 | 0.00931 |
| 900 | 0.00774 | 0.00861 | 0.00918 |
| 899 | 0.00786 | 0.00855 | 0.00905 |
| 898 | 0.00799 | 0.00849 | 0.00904 |
| 897 | 0.00797 | 0.00838 | 0.00897 |
| 896 | 0.00794 | 0.00837 | 0.00895 |
| 895 | 0.00798 | 0.00844 | 0.00881 |
| 894 | 0.00762 | 0.00851 | 0.00865 |
| 893 | 0.00761 | 0.0085  | 0.00851 |
| 892 | 0.00752 | 0.0085  | 0.00841 |

|     |         |         |         |
|-----|---------|---------|---------|
| 891 | 0.00722 | 0.00854 | 0.00842 |
| 890 | 0.00744 | 0.00861 | 0.00821 |
| 889 | 0.00772 | 0.00863 | 0.0082  |
| 888 | 0.00738 | 0.00859 | 0.00815 |
| 887 | 0.0073  | 0.00851 | 0.0082  |
| 886 | 0.00732 | 0.00841 | 0.00827 |
| 885 | 0.00727 | 0.00837 | 0.00828 |
| 884 | 0.00716 | 0.0084  | 0.00824 |
| 883 | 0.00694 | 0.00842 | 0.00857 |
| 882 | 0.00692 | 0.00844 | 0.0087  |
| 881 | 0.00688 | 0.00848 | 0.00862 |
| 880 | 0.00682 | 0.00851 | 0.00843 |
| 879 | 0.00677 | 0.0084  | 0.00856 |
| 878 | 0.00687 | 0.00824 | 0.00858 |
| 877 | 0.00689 | 0.00816 | 0.00874 |
| 876 | 0.00726 | 0.0082  | 0.00867 |
| 875 | 0.00735 | 0.00806 | 0.00868 |
| 874 | 0.00711 | 0.00798 | 0.00869 |
| 873 | 0.0068  | 0.00788 | 0.00876 |
| 872 | 0.00672 | 0.00793 | 0.00874 |
| 871 | 0.00658 | 0.00798 | 0.00855 |
| 870 | 0.00643 | 0.00799 | 0.00837 |
| 869 | 0.00625 | 0.00807 | 0.00829 |
| 868 | 0.00637 | 0.00801 | 0.00837 |
| 867 | 0.00667 | 0.00795 | 0.00823 |
| 866 | 0.00653 | 0.00795 | 0.00797 |
| 865 | 0.00634 | 0.00798 | 0.00799 |
| 864 | 0.00628 | 0.00799 | 0.00823 |
| 863 | 0.00624 | 0.00798 | 0.00809 |
| 862 | 0.00602 | 0.00805 | 0.00812 |
| 861 | 0.00595 | 0.00803 | 0.00816 |
| 860 | 0.00561 | 0.00788 | 0.00818 |
| 859 | 0.00549 | 0.00795 | 0.00823 |
| 858 | 0.00535 | 0.00791 | 0.00818 |
| 857 | 0.00535 | 0.00792 | 0.00818 |
| 856 | 0.00519 | 0.00782 | 0.00812 |
| 855 | 0.00524 | 0.00786 | 0.0082  |

|     |         |         |         |
|-----|---------|---------|---------|
| 854 | 0.00545 | 0.00791 | 0.00822 |
| 853 | 0.0054  | 0.00777 | 0.00814 |
| 852 | 0.00523 | 0.00777 | 0.00811 |
| 851 | 0.00496 | 0.00764 | 0.00777 |
| 850 | 0.00739 | 0.0079  | 0.00874 |
| 849 | 0.00742 | 0.00787 | 0.00876 |
| 848 | 0.00739 | 0.00787 | 0.00871 |
| 847 | 0.00734 | 0.008   | 0.00862 |
| 846 | 0.00761 | 0.00798 | 0.00874 |
| 845 | 0.00768 | 0.0079  | 0.00867 |
| 844 | 0.00759 | 0.00784 | 0.00857 |
| 843 | 0.00755 | 0.0078  | 0.00855 |
| 842 | 0.00754 | 0.00772 | 0.00846 |
| 841 | 0.00757 | 0.00775 | 0.00843 |
| 840 | 0.0074  | 0.00772 | 0.00844 |
| 839 | 0.00742 | 0.00771 | 0.00853 |
| 838 | 0.00757 | 0.00769 | 0.00848 |
| 837 | 0.00761 | 0.00774 | 0.00849 |
| 836 | 0.0076  | 0.00773 | 0.00841 |
| 835 | 0.00766 | 0.00769 | 0.00847 |
| 834 | 0.00769 | 0.00769 | 0.00838 |
| 833 | 0.00771 | 0.00761 | 0.00839 |
| 832 | 0.00766 | 0.0076  | 0.00844 |
| 831 | 0.00761 | 0.00761 | 0.00843 |
| 830 | 0.00752 | 0.00756 | 0.00831 |
| 829 | 0.00737 | 0.00755 | 0.00829 |
| 828 | 0.00743 | 0.0076  | 0.00836 |
| 827 | 0.00746 | 0.00761 | 0.00841 |
| 826 | 0.00743 | 0.00764 | 0.00844 |
| 825 | 0.0074  | 0.00762 | 0.00845 |
| 824 | 0.00745 | 0.00764 | 0.00843 |
| 823 | 0.00752 | 0.00765 | 0.00838 |
| 822 | 0.00741 | 0.00764 | 0.00845 |
| 821 | 0.00739 | 0.00763 | 0.00845 |
| 820 | 0.00741 | 0.00766 | 0.00856 |
| 819 | 0.0073  | 0.00773 | 0.00849 |
| 818 | 0.00714 | 0.00773 | 0.00851 |

|     |         |         |         |
|-----|---------|---------|---------|
| 817 | 0.00711 | 0.00778 | 0.00854 |
| 816 | 0.00721 | 0.00774 | 0.00844 |
| 815 | 0.00729 | 0.00766 | 0.00846 |
| 814 | 0.00725 | 0.00774 | 0.00855 |
| 813 | 0.0073  | 0.00773 | 0.00855 |
| 812 | 0.00718 | 0.00769 | 0.00855 |
| 811 | 0.00716 | 0.00764 | 0.00846 |
| 810 | 0.00716 | 0.00763 | 0.00848 |
| 809 | 0.00715 | 0.00762 | 0.00851 |
| 808 | 0.00724 | 0.00766 | 0.00855 |
| 807 | 0.0072  | 0.00769 | 0.00861 |
| 806 | 0.00716 | 0.00771 | 0.00857 |
| 805 | 0.00712 | 0.00767 | 0.00856 |
| 804 | 0.00715 | 0.00764 | 0.00857 |
| 803 | 0.00717 | 0.00762 | 0.00864 |
| 802 | 0.00723 | 0.00753 | 0.00863 |
| 801 | 0.00717 | 0.0076  | 0.00861 |
| 800 | 0.00715 | 0.00765 | 0.00872 |
| 799 | 0.00705 | 0.00765 | 0.00877 |
| 798 | 0.00714 | 0.0076  | 0.00875 |
| 797 | 0.00712 | 0.00754 | 0.00879 |
| 796 | 0.00718 | 0.00755 | 0.00878 |
| 795 | 0.00709 | 0.00758 | 0.00885 |
| 794 | 0.00704 | 0.00757 | 0.00884 |
| 793 | 0.00714 | 0.00758 | 0.00881 |
| 792 | 0.00706 | 0.00755 | 0.00883 |
| 791 | 0.00711 | 0.0075  | 0.00874 |
| 790 | 0.00715 | 0.00746 | 0.00875 |
| 789 | 0.00714 | 0.00745 | 0.00876 |
| 788 | 0.00707 | 0.00749 | 0.00879 |
| 787 | 0.00707 | 0.00747 | 0.00877 |
| 786 | 0.00713 | 0.0075  | 0.00874 |
| 785 | 0.00716 | 0.0075  | 0.00879 |
| 784 | 0.00709 | 0.00751 | 0.00876 |
| 783 | 0.00714 | 0.00751 | 0.00867 |
| 782 | 0.00704 | 0.00756 | 0.00871 |
| 781 | 0.00707 | 0.00761 | 0.00875 |

|     |         |         |         |
|-----|---------|---------|---------|
| 780 | 0.00702 | 0.00763 | 0.00881 |
| 779 | 0.00701 | 0.00761 | 0.0088  |
| 778 | 0.00704 | 0.00763 | 0.00882 |
| 777 | 0.00696 | 0.00766 | 0.00888 |
| 776 | 0.00701 | 0.00765 | 0.00886 |
| 775 | 0.00697 | 0.00767 | 0.00893 |
| 774 | 0.00696 | 0.00769 | 0.00898 |
| 773 | 0.007   | 0.00772 | 0.009   |
| 772 | 0.00698 | 0.00772 | 0.00896 |
| 771 | 0.007   | 0.00775 | 0.00895 |
| 770 | 0.007   | 0.00779 | 0.00911 |
| 769 | 0.00698 | 0.00777 | 0.00909 |
| 768 | 0.00703 | 0.00774 | 0.00915 |
| 767 | 0.00702 | 0.0078  | 0.00924 |
| 766 | 0.00712 | 0.00783 | 0.00926 |
| 765 | 0.00713 | 0.00784 | 0.00931 |
| 764 | 0.00712 | 0.00783 | 0.0093  |
| 763 | 0.00714 | 0.00785 | 0.00935 |
| 762 | 0.00707 | 0.00788 | 0.00939 |
| 761 | 0.00711 | 0.00787 | 0.0094  |
| 760 | 0.00707 | 0.00789 | 0.00949 |
| 759 | 0.007   | 0.0079  | 0.00955 |
| 758 | 0.00697 | 0.00791 | 0.00958 |
| 757 | 0.0069  | 0.00792 | 0.00959 |
| 756 | 0.0069  | 0.00792 | 0.00968 |
| 755 | 0.0069  | 0.00795 | 0.00978 |
| 754 | 0.00691 | 0.00799 | 0.00981 |
| 753 | 0.00694 | 0.008   | 0.00991 |
| 752 | 0.00686 | 0.00805 | 0.01    |
| 751 | 0.00683 | 0.00809 | 0.0101  |
| 750 | 0.00679 | 0.00809 | 0.0102  |
| 749 | 0.00676 | 0.00813 | 0.0102  |
| 748 | 0.00674 | 0.00822 | 0.0103  |
| 747 | 0.00675 | 0.00827 | 0.0103  |
| 746 | 0.00685 | 0.00827 | 0.0104  |
| 745 | 0.00676 | 0.00829 | 0.0105  |
| 744 | 0.00679 | 0.00833 | 0.0105  |

|     |         |         |        |
|-----|---------|---------|--------|
| 743 | 0.00685 | 0.0084  | 0.0105 |
| 742 | 0.00684 | 0.00845 | 0.0106 |
| 741 | 0.00681 | 0.00852 | 0.0108 |
| 740 | 0.00686 | 0.00863 | 0.0108 |
| 739 | 0.0068  | 0.00863 | 0.011  |
| 738 | 0.00687 | 0.00869 | 0.011  |
| 737 | 0.00685 | 0.00876 | 0.0111 |
| 736 | 0.00686 | 0.0088  | 0.0111 |
| 735 | 0.00687 | 0.00884 | 0.0112 |
| 734 | 0.00689 | 0.0089  | 0.0112 |
| 733 | 0.00689 | 0.00891 | 0.0113 |
| 732 | 0.00689 | 0.00899 | 0.0114 |
| 731 | 0.00696 | 0.00905 | 0.0115 |
| 730 | 0.00697 | 0.00909 | 0.0116 |
| 729 | 0.00693 | 0.00912 | 0.0117 |
| 728 | 0.0069  | 0.00924 | 0.0118 |
| 727 | 0.00693 | 0.0093  | 0.0118 |
| 726 | 0.0069  | 0.00938 | 0.012  |
| 725 | 0.0068  | 0.00944 | 0.0121 |
| 724 | 0.00688 | 0.00956 | 0.0122 |
| 723 | 0.00686 | 0.00964 | 0.0123 |
| 722 | 0.00683 | 0.0097  | 0.0125 |
| 721 | 0.00684 | 0.00979 | 0.0126 |
| 720 | 0.00675 | 0.00989 | 0.0127 |
| 719 | 0.00676 | 0.01    | 0.0128 |
| 718 | 0.00671 | 0.0101  | 0.013  |
| 717 | 0.00665 | 0.0102  | 0.0131 |
| 716 | 0.00666 | 0.0103  | 0.0133 |
| 715 | 0.00667 | 0.0105  | 0.0134 |
| 714 | 0.00665 | 0.0106  | 0.0136 |
| 713 | 0.00666 | 0.0108  | 0.0138 |
| 712 | 0.00667 | 0.0109  | 0.0139 |
| 711 | 0.00668 | 0.011   | 0.0141 |
| 710 | 0.00666 | 0.0111  | 0.0143 |
| 709 | 0.00666 | 0.0112  | 0.0145 |
| 708 | 0.00665 | 0.0113  | 0.0147 |
| 707 | 0.00668 | 0.0114  | 0.0148 |

|     |         |        |        |
|-----|---------|--------|--------|
| 706 | 0.00671 | 0.0116 | 0.015  |
| 705 | 0.0067  | 0.0118 | 0.0152 |
| 704 | 0.0067  | 0.0119 | 0.0154 |
| 703 | 0.00667 | 0.012  | 0.0157 |
| 702 | 0.00665 | 0.0122 | 0.0159 |
| 701 | 0.00666 | 0.0124 | 0.016  |
| 700 | 0.00665 | 0.0126 | 0.0162 |
| 699 | 0.00664 | 0.0127 | 0.0164 |
| 698 | 0.00664 | 0.0129 | 0.0167 |
| 697 | 0.00664 | 0.013  | 0.0168 |
| 696 | 0.00663 | 0.0132 | 0.0171 |
| 695 | 0.00661 | 0.0134 | 0.0174 |
| 694 | 0.0066  | 0.0136 | 0.0176 |
| 693 | 0.00659 | 0.0138 | 0.0178 |
| 692 | 0.00654 | 0.0141 | 0.0181 |
| 691 | 0.00649 | 0.0143 | 0.0184 |
| 690 | 0.00647 | 0.0145 | 0.0187 |
| 689 | 0.00643 | 0.0148 | 0.019  |
| 688 | 0.00638 | 0.015  | 0.0193 |
| 687 | 0.00638 | 0.0153 | 0.0197 |
| 686 | 0.00643 | 0.0156 | 0.02   |
| 685 | 0.00642 | 0.0158 | 0.0203 |
| 684 | 0.00643 | 0.0161 | 0.0207 |
| 683 | 0.00643 | 0.0164 | 0.021  |
| 682 | 0.00644 | 0.0166 | 0.0213 |
| 681 | 0.0064  | 0.0169 | 0.0217 |
| 680 | 0.00641 | 0.0172 | 0.0221 |
| 679 | 0.00644 | 0.0175 | 0.0224 |
| 678 | 0.00642 | 0.0178 | 0.0228 |
| 677 | 0.00638 | 0.0181 | 0.0232 |
| 676 | 0.00638 | 0.0184 | 0.0236 |
| 675 | 0.00641 | 0.0187 | 0.0239 |
| 674 | 0.00638 | 0.0191 | 0.0243 |
| 673 | 0.00638 | 0.0194 | 0.0247 |
| 672 | 0.0064  | 0.0198 | 0.0251 |
| 671 | 0.00636 | 0.0202 | 0.0254 |
| 670 | 0.00632 | 0.0206 | 0.0259 |

|     |         |        |        |
|-----|---------|--------|--------|
| 669 | 0.00631 | 0.021  | 0.0264 |
| 668 | 0.00632 | 0.0213 | 0.0269 |
| 667 | 0.0063  | 0.0217 | 0.0273 |
| 666 | 0.00629 | 0.0222 | 0.0278 |
| 665 | 0.00634 | 0.0226 | 0.0283 |
| 664 | 0.00632 | 0.023  | 0.0288 |
| 663 | 0.00626 | 0.0234 | 0.0293 |
| 662 | 0.00627 | 0.0239 | 0.0299 |
| 661 | 0.00631 | 0.0244 | 0.0304 |
| 660 | 0.0063  | 0.0249 | 0.031  |
| 659 | 0.00627 | 0.0254 | 0.0316 |
| 658 | 0.00625 | 0.0259 | 0.0323 |
| 657 | 0.00624 | 0.0264 | 0.033  |
| 656 | 0.00623 | 0.0269 | 0.0336 |
| 655 | 0.00624 | 0.0274 | 0.0343 |
| 654 | 0.00622 | 0.028  | 0.0349 |
| 653 | 0.00623 | 0.0286 | 0.0356 |
| 652 | 0.00621 | 0.0291 | 0.0364 |
| 651 | 0.00617 | 0.0298 | 0.0371 |
| 650 | 0.00613 | 0.0303 | 0.0378 |
| 649 | 0.00609 | 0.0309 | 0.0385 |
| 648 | 0.00611 | 0.0316 | 0.0392 |
| 647 | 0.00611 | 0.0323 | 0.04   |
| 646 | 0.00611 | 0.033  | 0.0408 |
| 645 | 0.00608 | 0.0336 | 0.0416 |
| 644 | 0.00611 | 0.0344 | 0.0424 |
| 643 | 0.00613 | 0.035  | 0.0431 |
| 642 | 0.00618 | 0.0358 | 0.0439 |
| 641 | 0.00618 | 0.0366 | 0.0447 |
| 640 | 0.00621 | 0.0373 | 0.0456 |
| 639 | 0.00623 | 0.0381 | 0.0465 |
| 638 | 0.00628 | 0.0389 | 0.0475 |
| 637 | 0.00631 | 0.0397 | 0.0485 |
| 636 | 0.00635 | 0.0406 | 0.0493 |
| 635 | 0.00634 | 0.0414 | 0.0503 |
| 634 | 0.00639 | 0.0423 | 0.0513 |
| 633 | 0.00643 | 0.0433 | 0.0523 |



|     |         |        |        |
|-----|---------|--------|--------|
| 632 | 0.00647 | 0.0442 | 0.0534 |
| 631 | 0.00649 | 0.0451 | 0.0544 |
| 630 | 0.00653 | 0.0461 | 0.0554 |
| 629 | 0.00656 | 0.0471 | 0.0565 |
| 628 | 0.00659 | 0.048  | 0.0576 |
| 627 | 0.00659 | 0.049  | 0.0588 |
| 626 | 0.00665 | 0.0501 | 0.06   |
| 625 | 0.0067  | 0.0512 | 0.0612 |
| 624 | 0.00674 | 0.0523 | 0.0624 |
| 623 | 0.00676 | 0.0535 | 0.0635 |
| 622 | 0.00682 | 0.0547 | 0.0647 |
| 621 | 0.00684 | 0.0558 | 0.0659 |
| 620 | 0.00689 | 0.0569 | 0.0673 |
| 619 | 0.00699 | 0.0582 | 0.0687 |
| 618 | 0.00704 | 0.0594 | 0.07   |
| 617 | 0.00708 | 0.0606 | 0.0715 |
| 616 | 0.00709 | 0.0619 | 0.0728 |
| 615 | 0.0072  | 0.0632 | 0.0742 |
| 614 | 0.00719 | 0.0645 | 0.0758 |
| 613 | 0.00727 | 0.0659 | 0.0773 |
| 612 | 0.00733 | 0.0672 | 0.0789 |
| 611 | 0.00745 | 0.0687 | 0.0804 |
| 610 | 0.00748 | 0.0702 | 0.0819 |
| 609 | 0.00753 | 0.0716 | 0.0836 |
| 608 | 0.0076  | 0.0732 | 0.0853 |
| 607 | 0.00773 | 0.0746 | 0.087  |
| 606 | 0.00775 | 0.0762 | 0.0887 |
| 605 | 0.00791 | 0.0778 | 0.0904 |
| 604 | 0.00801 | 0.0795 | 0.0922 |
| 603 | 0.00812 | 0.0812 | 0.094  |
| 602 | 0.00825 | 0.0831 | 0.0958 |
| 601 | 0.0083  | 0.0849 | 0.0978 |
| 600 | 0.00833 | 0.0865 | 0.0994 |
| 599 | 0.00846 | 0.0883 | 0.101  |
| 598 | 0.00864 | 0.0901 | 0.103  |
| 597 | 0.00879 | 0.092  | 0.105  |
| 596 | 0.00895 | 0.094  | 0.107  |

|     |         |       |       |
|-----|---------|-------|-------|
| 595 | 0.00916 | 0.096 | 0.11  |
| 594 | 0.0093  | 0.098 | 0.112 |
| 593 | 0.00949 | 0.1   | 0.114 |
| 592 | 0.00973 | 0.102 | 0.116 |
| 591 | 0.00994 | 0.104 | 0.118 |
| 590 | 0.0101  | 0.106 | 0.121 |
| 589 | 0.0103  | 0.109 | 0.123 |
| 588 | 0.0105  | 0.111 | 0.126 |
| 587 | 0.0108  | 0.113 | 0.128 |
| 586 | 0.011   | 0.116 | 0.13  |
| 585 | 0.0113  | 0.118 | 0.133 |
| 584 | 0.0115  | 0.12  | 0.135 |
| 583 | 0.0117  | 0.123 | 0.138 |
| 582 | 0.012   | 0.125 | 0.14  |
| 581 | 0.0123  | 0.128 | 0.143 |
| 580 | 0.0126  | 0.131 | 0.146 |
| 579 | 0.0128  | 0.133 | 0.148 |
| 578 | 0.0132  | 0.136 | 0.151 |
| 577 | 0.0135  | 0.139 | 0.154 |
| 576 | 0.0138  | 0.141 | 0.157 |
| 575 | 0.0141  | 0.144 | 0.16  |
| 574 | 0.0144  | 0.147 | 0.162 |
| 573 | 0.0148  | 0.15  | 0.165 |
| 572 | 0.0151  | 0.153 | 0.168 |
| 571 | 0.0154  | 0.156 | 0.172 |
| 570 | 0.0158  | 0.159 | 0.175 |
| 569 | 0.0162  | 0.162 | 0.178 |
| 568 | 0.0167  | 0.165 | 0.181 |
| 567 | 0.0171  | 0.169 | 0.184 |
| 566 | 0.0175  | 0.172 | 0.188 |
| 565 | 0.018   | 0.175 | 0.191 |
| 564 | 0.0185  | 0.179 | 0.194 |
| 563 | 0.0189  | 0.182 | 0.198 |
| 562 | 0.0193  | 0.186 | 0.202 |
| 561 | 0.0198  | 0.189 | 0.205 |
| 560 | 0.0203  | 0.193 | 0.209 |
| 559 | 0.0209  | 0.197 | 0.212 |

|     |        |       |       |
|-----|--------|-------|-------|
| 558 | 0.0214 | 0.2   | 0.216 |
| 557 | 0.022  | 0.204 | 0.22  |
| 556 | 0.0226 | 0.208 | 0.224 |
| 555 | 0.0233 | 0.212 | 0.228 |
| 554 | 0.0238 | 0.217 | 0.232 |
| 553 | 0.0245 | 0.221 | 0.236 |
| 552 | 0.0251 | 0.225 | 0.241 |
| 551 | 0.0258 | 0.229 | 0.245 |
| 550 | 0.0265 | 0.234 | 0.249 |
| 549 | 0.0271 | 0.238 | 0.253 |
| 548 | 0.0278 | 0.243 | 0.258 |
| 547 | 0.0286 | 0.247 | 0.262 |
| 546 | 0.0294 | 0.252 | 0.267 |
| 545 | 0.0302 | 0.257 | 0.272 |
| 544 | 0.0312 | 0.262 | 0.277 |
| 543 | 0.032  | 0.267 | 0.282 |
| 542 | 0.0329 | 0.272 | 0.286 |
| 541 | 0.0337 | 0.277 | 0.291 |
| 540 | 0.0346 | 0.282 | 0.296 |
| 539 | 0.0356 | 0.287 | 0.301 |
| 538 | 0.0366 | 0.292 | 0.306 |
| 537 | 0.0377 | 0.298 | 0.312 |
| 536 | 0.0385 | 0.303 | 0.317 |
| 535 | 0.0396 | 0.309 | 0.322 |
| 534 | 0.0406 | 0.314 | 0.328 |
| 533 | 0.0417 | 0.32  | 0.333 |
| 532 | 0.0428 | 0.326 | 0.338 |
| 531 | 0.044  | 0.331 | 0.344 |
| 530 | 0.0451 | 0.337 | 0.35  |
| 529 | 0.0463 | 0.343 | 0.355 |
| 528 | 0.0474 | 0.349 | 0.361 |
| 527 | 0.0487 | 0.355 | 0.367 |
| 526 | 0.05   | 0.362 | 0.373 |
| 525 | 0.0513 | 0.368 | 0.379 |
| 524 | 0.0527 | 0.375 | 0.386 |
| 523 | 0.0542 | 0.381 | 0.392 |
| 522 | 0.0556 | 0.388 | 0.398 |

|     |        |       |       |
|-----|--------|-------|-------|
| 521 | 0.057  | 0.395 | 0.405 |
| 520 | 0.0591 | 0.402 | 0.411 |
| 519 | 0.0606 | 0.409 | 0.418 |
| 518 | 0.0623 | 0.416 | 0.425 |
| 517 | 0.064  | 0.423 | 0.431 |
| 516 | 0.0656 | 0.431 | 0.438 |
| 515 | 0.0674 | 0.439 | 0.445 |
| 514 | 0.0692 | 0.446 | 0.452 |
| 513 | 0.0709 | 0.453 | 0.459 |
| 512 | 0.0726 | 0.461 | 0.467 |
| 511 | 0.0745 | 0.469 | 0.474 |
| 510 | 0.0764 | 0.477 | 0.482 |
| 509 | 0.0784 | 0.485 | 0.49  |
| 508 | 0.0806 | 0.493 | 0.498 |
| 507 | 0.0826 | 0.501 | 0.506 |
| 506 | 0.0848 | 0.51  | 0.514 |
| 505 | 0.0872 | 0.519 | 0.522 |
| 504 | 0.0894 | 0.528 | 0.53  |
| 503 | 0.0918 | 0.536 | 0.538 |
| 502 | 0.0942 | 0.545 | 0.547 |
| 501 | 0.0966 | 0.555 | 0.556 |
| 500 | 0.0992 | 0.564 | 0.564 |
| 499 | 0.102  | 0.573 | 0.573 |
| 498 | 0.104  | 0.582 | 0.582 |
| 497 | 0.107  | 0.592 | 0.591 |
| 496 | 0.11   | 0.601 | 0.6   |
| 495 | 0.113  | 0.61  | 0.609 |
| 494 | 0.116  | 0.62  | 0.618 |
| 493 | 0.119  | 0.63  | 0.627 |
| 492 | 0.122  | 0.64  | 0.636 |
| 491 | 0.125  | 0.649 | 0.646 |
| 490 | 0.128  | 0.659 | 0.655 |
| 489 | 0.132  | 0.669 | 0.665 |
| 488 | 0.135  | 0.68  | 0.674 |
| 487 | 0.138  | 0.69  | 0.684 |
| 486 | 0.142  | 0.701 | 0.694 |
| 485 | 0.146  | 0.712 | 0.704 |

|     |       |       |       |
|-----|-------|-------|-------|
| 484 | 0.149 | 0.722 | 0.714 |
| 483 | 0.153 | 0.733 | 0.725 |
| 482 | 0.157 | 0.744 | 0.735 |
| 481 | 0.16  | 0.755 | 0.746 |
| 480 | 0.165 | 0.767 | 0.756 |
| 479 | 0.169 | 0.778 | 0.767 |
| 478 | 0.173 | 0.79  | 0.778 |
| 477 | 0.177 | 0.801 | 0.789 |
| 476 | 0.181 | 0.814 | 0.8   |
| 475 | 0.186 | 0.826 | 0.811 |
| 474 | 0.19  | 0.838 | 0.823 |
| 473 | 0.195 | 0.85  | 0.834 |
| 472 | 0.199 | 0.861 | 0.846 |
| 471 | 0.204 | 0.874 | 0.858 |
| 470 | 0.209 | 0.886 | 0.87  |
| 469 | 0.214 | 0.898 | 0.882 |
| 468 | 0.22  | 0.91  | 0.893 |
| 467 | 0.225 | 0.922 | 0.906 |
| 466 | 0.23  | 0.935 | 0.918 |
| 465 | 0.236 | 0.947 | 0.93  |
| 464 | 0.242 | 0.96  | 0.943 |
| 463 | 0.247 | 0.972 | 0.956 |
| 462 | 0.253 | 0.984 | 0.969 |
| 461 | 0.259 | 0.996 | 0.981 |
| 460 | 0.266 | 1.01  | 0.994 |
| 459 | 0.272 | 1.02  | 1.01  |
| 458 | 0.278 | 1.04  | 1.02  |
| 457 | 0.285 | 1.05  | 1.03  |
| 456 | 0.292 | 1.06  | 1.05  |
| 455 | 0.299 | 1.07  | 1.06  |
| 454 | 0.306 | 1.09  | 1.07  |
| 453 | 0.313 | 1.1   | 1.09  |
| 452 | 0.32  | 1.11  | 1.1   |
| 451 | 0.327 | 1.13  | 1.11  |
| 450 | 0.334 | 1.14  | 1.13  |
| 449 | 0.341 | 1.15  | 1.14  |
| 448 | 0.349 | 1.17  | 1.16  |

|     |       |      |      |
|-----|-------|------|------|
| 447 | 0.357 | 1.18 | 1.17 |
| 446 | 0.365 | 1.19 | 1.18 |
| 445 | 0.373 | 1.21 | 1.2  |
| 444 | 0.381 | 1.22 | 1.21 |
| 443 | 0.389 | 1.23 | 1.23 |
| 442 | 0.398 | 1.25 | 1.24 |
| 441 | 0.406 | 1.26 | 1.25 |
| 440 | 0.416 | 1.27 | 1.27 |
| 439 | 0.425 | 1.28 | 1.28 |
| 438 | 0.434 | 1.3  | 1.3  |
| 437 | 0.443 | 1.31 | 1.31 |
| 436 | 0.452 | 1.32 | 1.32 |
| 435 | 0.462 | 1.34 | 1.34 |
| 434 | 0.472 | 1.35 | 1.35 |
| 433 | 0.482 | 1.36 | 1.37 |
| 432 | 0.492 | 1.37 | 1.38 |
| 431 | 0.502 | 1.39 | 1.39 |
| 430 | 0.513 | 1.4  | 1.41 |
| 429 | 0.523 | 1.41 | 1.42 |
| 428 | 0.534 | 1.42 | 1.43 |
| 427 | 0.545 | 1.43 | 1.45 |
| 426 | 0.556 | 1.45 | 1.46 |
| 425 | 0.568 | 1.46 | 1.48 |
| 424 | 0.578 | 1.47 | 1.49 |
| 423 | 0.59  | 1.48 | 1.5  |
| 422 | 0.601 | 1.49 | 1.52 |
| 421 | 0.613 | 1.5  | 1.53 |
| 420 | 0.626 | 1.51 | 1.54 |
| 419 | 0.638 | 1.52 | 1.55 |
| 418 | 0.652 | 1.54 | 1.57 |
| 417 | 0.664 | 1.55 | 1.58 |
| 416 | 0.677 | 1.56 | 1.59 |
| 415 | 0.689 | 1.57 | 1.6  |
| 414 | 0.702 | 1.58 | 1.61 |
| 413 | 0.715 | 1.59 | 1.62 |
| 412 | 0.728 | 1.6  | 1.63 |
| 411 | 0.741 | 1.61 | 1.65 |

|     |       |      |      |
|-----|-------|------|------|
| 410 | 0.755 | 1.62 | 1.66 |
| 409 | 0.768 | 1.63 | 1.67 |
| 408 | 0.782 | 1.64 | 1.68 |
| 407 | 0.797 | 1.65 | 1.69 |
| 406 | 0.812 | 1.65 | 1.7  |
| 405 | 0.827 | 1.67 | 1.71 |
| 404 | 0.842 | 1.68 | 1.72 |
| 403 | 0.859 | 1.69 | 1.73 |
| 402 | 0.875 | 1.7  | 1.74 |
| 401 | 0.892 | 1.71 | 1.76 |
| 400 | 0.909 | 1.72 | 1.77 |
| 399 | 0.928 | 1.73 | 1.78 |
| 398 | 0.946 | 1.74 | 1.79 |
| 397 | 0.964 | 1.75 | 1.8  |
| 396 | 0.984 | 1.76 | 1.81 |
| 395 | 1     | 1.78 | 1.82 |
| 394 | 1.02  | 1.79 | 1.83 |
| 393 | 1.05  | 1.8  | 1.84 |
| 392 | 1.07  | 1.81 | 1.85 |
| 391 | 1.09  | 1.82 | 1.86 |
| 390 | 1.11  | 1.83 | 1.87 |
| 389 | 1.13  | 1.84 | 1.89 |
| 388 | 1.15  | 1.85 | 1.9  |
| 387 | 1.18  | 1.86 | 1.9  |
| 386 | 1.2   | 1.87 | 1.91 |
| 385 | 1.22  | 1.89 | 1.93 |
| 384 | 1.25  | 1.9  | 1.94 |
| 383 | 1.27  | 1.91 | 1.95 |
| 382 | 1.3   | 1.92 | 1.96 |
| 381 | 1.33  | 1.93 | 1.97 |
| 380 | 1.35  | 1.95 | 1.98 |
| 379 | 1.38  | 1.96 | 1.99 |
| 378 | 1.4   | 1.98 | 2    |
| 377 | 1.43  | 1.99 | 2.01 |
| 376 | 1.46  | 2.01 | 2.02 |
| 375 | 1.49  | 2.02 | 2.04 |
| 374 | 1.52  | 2.04 | 2.05 |

|     |      |      |      |
|-----|------|------|------|
| 373 | 1.56 | 2.06 | 2.06 |
| 372 | 1.59 | 2.07 | 2.08 |
| 371 | 1.62 | 2.09 | 2.1  |
| 370 | 1.64 | 2.09 | 2.11 |
| 369 | 1.69 | 2.12 | 2.13 |
| 368 | 1.73 | 2.14 | 2.15 |
| 367 | 1.77 | 2.17 | 2.17 |
| 366 | 1.81 | 2.19 | 2.19 |
| 365 | 1.85 | 2.22 | 2.22 |
| 364 | 1.89 | 2.25 | 2.24 |
| 363 | 1.93 | 2.27 | 2.26 |
| 362 | 1.97 | 2.29 | 2.29 |
| 361 | 2.02 | 2.32 | 2.32 |
| 360 | 2.06 | 2.36 | 2.35 |
| 359 | 2.11 | 2.38 | 2.38 |
| 358 | 2.15 | 2.41 | 2.4  |
| 357 | 2.2  | 2.44 | 2.43 |
| 356 | 2.24 | 2.47 | 2.46 |
| 355 | 2.28 | 2.49 | 2.49 |
| 354 | 2.32 | 2.51 | 2.52 |
| 353 | 2.35 | 2.52 | 2.54 |
| 352 | 2.39 | 2.55 | 2.57 |
| 351 | 2.42 | 2.57 | 2.59 |
| 350 | 2.46 | 2.58 | 2.61 |
| 349 | 2.5  | 2.6  | 2.64 |
| 348 | 2.52 | 2.62 | 2.66 |
| 347 | 2.55 | 2.63 | 2.68 |
| 346 | 2.57 | 2.65 | 2.7  |
| 345 | 2.59 | 2.66 | 2.72 |
| 344 | 2.62 | 2.67 | 2.74 |
| 343 | 2.63 | 2.68 | 2.75 |
| 342 | 2.65 | 2.7  | 2.76 |
| 341 | 2.67 | 2.71 | 2.78 |
| 340 | 2.7  | 2.7  | 2.82 |
| 339 | 2.7  | 2.72 | 2.83 |
| 338 | 2.7  | 2.72 | 2.83 |
| 337 | 2.71 | 2.73 | 2.85 |



|     |      |      |      |
|-----|------|------|------|
| 336 | 2.72 | 2.73 | 2.85 |
| 335 | 2.73 | 2.73 | 2.87 |
| 334 | 2.73 | 2.73 | 2.88 |
| 333 | 2.73 | 2.73 | 2.89 |
| 332 | 2.73 | 2.72 | 2.9  |
| 331 | 2.73 | 2.72 | 2.9  |
| 330 | 2.74 | 2.71 | 2.9  |
| 329 | 2.74 | 2.7  | 2.9  |
| 328 | 2.73 | 2.7  | 2.9  |
| 327 | 2.72 | 2.69 | 2.9  |
| 326 | 2.7  | 2.68 | 2.9  |
| 325 | 2.7  | 2.67 | 2.88 |
| 324 | 2.69 | 2.67 | 2.87 |
| 323 | 2.67 | 2.65 | 2.87 |
| 322 | 2.66 | 2.64 | 2.86 |
| 321 | 2.65 | 2.63 | 2.84 |
| 320 | 2.63 | 2.61 | 2.84 |
| 319 | 2.62 | 2.59 | 2.82 |
| 318 | 2.61 | 2.59 | 2.81 |
| 317 | 2.6  | 2.57 | 2.79 |
| 316 | 2.58 | 2.57 | 2.77 |
| 315 | 2.56 | 2.55 | 2.76 |
| 314 | 2.55 | 2.54 | 2.75 |
| 313 | 2.53 | 2.52 | 2.73 |
| 312 | 2.51 | 2.51 | 2.72 |
| 311 | 2.5  | 2.49 | 2.7  |
| 310 | 2.49 | 2.48 | 2.69 |
| 309 | 2.47 | 2.46 | 2.68 |
| 308 | 2.46 | 2.44 | 2.67 |
| 307 | 2.45 | 2.42 | 2.65 |
| 306 | 2.43 | 2.41 | 2.63 |
| 305 | 2.42 | 2.39 | 2.62 |
| 304 | 2.41 | 2.37 | 2.6  |
| 303 | 2.39 | 2.36 | 2.58 |
| 302 | 2.37 | 2.34 | 2.56 |
| 301 | 2.35 | 2.33 | 2.55 |
| 300 | 2.33 | 2.32 | 2.53 |

|     |      |      |      |
|-----|------|------|------|
| 299 | 2.32 | 2.3  | 2.52 |
| 298 | 2.3  | 2.29 | 2.5  |
| 297 | 2.28 | 2.27 | 2.48 |
| 296 | 2.27 | 2.26 | 2.46 |
| 295 | 2.25 | 2.25 | 2.44 |
| 294 | 2.23 | 2.23 | 2.43 |
| 293 | 2.22 | 2.21 | 2.41 |
| 292 | 2.2  | 2.21 | 2.4  |
| 291 | 2.19 | 2.19 | 2.39 |
| 290 | 2.17 | 2.18 | 2.37 |
| 289 | 2.15 | 2.16 | 2.35 |
| 288 | 2.13 | 2.15 | 2.34 |
| 287 | 2.12 | 2.14 | 2.32 |
| 286 | 2.11 | 2.12 | 2.31 |
| 285 | 2.1  | 2.11 | 2.29 |
| 284 | 2.08 | 2.09 | 2.28 |
| 283 | 2.06 | 2.08 | 2.26 |
| 282 | 2.05 | 2.07 | 2.25 |
| 281 | 2.03 | 2.05 | 2.23 |
| 280 | 2.02 | 2.04 | 2.21 |
| 279 | 2    | 2.02 | 2.2  |
| 278 | 1.98 | 2    | 2.19 |
| 277 | 1.97 | 1.99 | 2.17 |
| 276 | 1.95 | 1.97 | 2.16 |
| 275 | 1.93 | 1.96 | 2.14 |
| 274 | 1.92 | 1.95 | 2.12 |
| 273 | 1.91 | 1.93 | 2.11 |
| 272 | 1.89 | 1.92 | 2.09 |
| 271 | 1.87 | 1.9  | 2.07 |
| 270 | 1.86 | 1.89 | 2.05 |
| 269 | 1.84 | 1.88 | 2.04 |
| 268 | 1.82 | 1.87 | 2.02 |
| 267 | 1.81 | 1.85 | 2    |
| 266 | 1.8  | 1.84 | 1.98 |
| 265 | 1.79 | 1.83 | 1.97 |
| 264 | 1.77 | 1.82 | 1.95 |
| 263 | 1.75 | 1.8  | 1.94 |

|     |      |      |      |
|-----|------|------|------|
| 262 | 1.74 | 1.79 | 1.92 |
| 261 | 1.72 | 1.78 | 1.91 |
| 260 | 1.71 | 1.77 | 1.89 |
| 259 | 1.7  | 1.76 | 1.88 |
| 258 | 1.69 | 1.75 | 1.87 |
| 257 | 1.68 | 1.74 | 1.86 |
| 256 | 1.68 | 1.74 | 1.85 |
| 255 | 1.67 | 1.73 | 1.84 |
| 254 | 1.66 | 1.72 | 1.83 |
| 253 | 1.66 | 1.71 | 1.83 |
| 252 | 1.65 | 1.71 | 1.82 |
| 251 | 1.65 | 1.7  | 1.82 |
| 250 | 1.64 | 1.69 | 1.82 |
| 249 | 1.63 | 1.69 | 1.82 |
| 248 | 1.63 | 1.69 | 1.81 |
| 247 | 1.63 | 1.69 | 1.81 |
| 246 | 1.63 | 1.68 | 1.81 |
| 245 | 1.63 | 1.68 | 1.81 |
| 244 | 1.63 | 1.68 | 1.81 |
| 243 | 1.63 | 1.68 | 1.8  |
| 242 | 1.63 | 1.68 | 1.8  |
| 241 | 1.63 | 1.68 | 1.79 |
| 240 | 1.63 | 1.68 | 1.79 |
| 239 | 1.63 | 1.68 | 1.79 |
| 238 | 1.63 | 1.69 | 1.8  |
| 237 | 1.63 | 1.68 | 1.8  |
| 236 | 1.62 | 1.68 | 1.8  |
| 235 | 1.63 | 1.69 | 1.8  |
| 234 | 1.63 | 1.7  | 1.81 |
| 233 | 1.64 | 1.71 | 1.81 |
| 232 | 1.65 | 1.71 | 1.81 |
| 231 | 1.66 | 1.72 | 1.81 |
| 230 | 1.67 | 1.73 | 1.81 |
| 229 | 1.68 | 1.74 | 1.83 |
| 228 | 1.7  | 1.75 | 1.83 |
| 227 | 1.71 | 1.76 | 1.85 |
| 226 | 1.73 | 1.78 | 1.86 |

|     |      |      |      |
|-----|------|------|------|
| 225 | 1.74 | 1.79 | 1.88 |
| 224 | 1.76 | 1.81 | 1.9  |
| 223 | 1.77 | 1.83 | 1.9  |
| 222 | 1.8  | 1.84 | 1.92 |
| 221 | 1.82 | 1.87 | 1.93 |
| 220 | 1.84 | 1.89 | 1.95 |
| 219 | 1.85 | 1.92 | 1.98 |
| 218 | 1.88 | 1.93 | 1.99 |
| 217 | 1.91 | 1.94 | 2.02 |
| 216 | 1.93 | 1.97 | 2.04 |
| 215 | 1.95 | 2    | 2.06 |
| 214 | 1.99 | 2.02 | 2.08 |
| 213 | 2.01 | 2.05 | 2.1  |
| 212 | 2.05 | 2.07 | 2.14 |
| 211 | 2.07 | 2.12 | 2.15 |
| 210 | 2.08 | 2.13 | 2.17 |
| 209 | 2.11 | 2.16 | 2.2  |
| 208 | 2.15 | 2.17 | 2.22 |
| 207 | 2.18 | 2.18 | 2.26 |
| 206 | 2.22 | 2.21 | 2.29 |
| 205 | 2.25 | 2.23 | 2.33 |
| 204 | 2.29 | 2.27 | 2.33 |
| 203 | 2.32 | 2.31 | 2.32 |
| 202 | 2.32 | 2.32 | 2.34 |
| 201 | 2.38 | 2.37 | 2.32 |
| 200 | 2.38 | 2.39 | 2.31 |

Table 4. Experimental data of the UV-vis absorption spectra in Fig. 3(b).

| Wavelength (nm) | Abs_SA   | Abs_SAOMe | Abs_HNA   |
|-----------------|----------|-----------|-----------|
| 500             | 0.00024  | 0.00153   | 2.91E-05  |
| 499             | 0.000229 | 0.00154   | 2.69E-05  |
| 498             | 0.000205 | 0.00155   | 2.53E-05  |
| 497             | 0.000192 | 0.00156   | 1.72E-05  |
| 496             | 0.000173 | 0.00157   | 1.48E-05  |
| 495             | 0.000184 | 0.00159   | 2.44E-05  |
| 494             | 0.000175 | 0.00159   | 2.83E-05  |
| 493             | 0.000181 | 0.00161   | 2.04E-05  |
| 492             | 0.000184 | 0.00162   | 1.36E-05  |
| 491             | 0.000197 | 0.00164   | 6.99E-06  |
| 490             | 0.000192 | 0.00166   | 4.20E-06  |
| 489             | 0.000191 | 0.00166   | 8.55E-06  |
| 488             | 0.000176 | 0.00166   | 1.45E-05  |
| 487             | 0.000195 | 0.00166   | 9.77E-06  |
| 486             | 0.00017  | 0.00164   | 4.19E-06  |
| 485             | 0.000169 | 0.00163   | -6.71E-07 |
| 484             | 0.000174 | 0.00166   | -2.98E-05 |
| 483             | 0.000185 | 0.00166   | -3.86E-05 |
| 482             | 0.00019  | 0.00168   | -6.91E-05 |
| 481             | 0.000187 | 0.00166   | -7.64E-05 |
| 480             | 0.000193 | 0.00167   | -8.17E-05 |
| 479             | 0.000177 | 0.00165   | -0.000101 |
| 478             | 0.000167 | 0.00167   | -0.000112 |
| 477             | 0.000154 | 0.00167   | -0.000125 |
| 476             | 0.000157 | 0.00166   | -0.000157 |
| 475             | 0.000148 | 0.00165   | -0.000167 |
| 474             | 0.00014  | 0.00162   | -0.000176 |
| 473             | 0.000127 | 0.00163   | -0.00018  |
| 472             | 0.000115 | 0.00163   | -0.000171 |
| 471             | 0.000115 | 0.00162   | -0.000176 |
| 470             | 0.000122 | 0.00164   | -0.000162 |
| 469             | 0.000138 | 0.00164   | -0.000146 |
| 468             | 0.000138 | 0.00165   | -0.000138 |
| 467             | 0.00013  | 0.00163   | -0.000131 |
| 466             | 0.000116 | 0.00162   | -0.000104 |

|     |          |         |           |
|-----|----------|---------|-----------|
| 465 | 0.000127 | 0.0016  | -9.26E-05 |
| 464 | 0.00015  | 0.00157 | -7.99E-05 |
| 463 | 0.000148 | 0.00157 | -7.31E-05 |
| 462 | 0.000163 | 0.00154 | -6.31E-05 |
| 461 | 0.000173 | 0.00154 | -5.72E-05 |
| 460 | 0.000205 | 0.0015  | -4.66E-05 |
| 459 | 0.000206 | 0.00148 | -3.52E-05 |
| 458 | 0.000197 | 0.00144 | -1.06E-05 |
| 457 | 0.000204 | 0.00141 | -1.54E-06 |
| 456 | 0.000225 | 0.00137 | 6.84E-06  |
| 455 | 0.00027  | 0.00134 | 2.03E-05  |
| 454 | 0.000264 | 0.00133 | 3.08E-05  |
| 453 | 0.000285 | 0.00132 | 6.00E-05  |
| 452 | 0.000288 | 0.0013  | 7.65E-05  |
| 451 | 0.0003   | 0.0013  | 8.49E-05  |
| 450 | 0.000314 | 0.00127 | 8.37E-05  |
| 449 | 0.000313 | 0.00126 | 9.53E-05  |
| 448 | 0.00031  | 0.00123 | 0.000118  |
| 447 | 0.000322 | 0.00123 | 0.000141  |
| 446 | 0.000334 | 0.00122 | 0.000153  |
| 445 | 0.000313 | 0.00122 | 0.000173  |
| 444 | 0.000332 | 0.00122 | 0.000204  |
| 443 | 0.000328 | 0.00119 | 0.000224  |
| 442 | 0.000353 | 0.00116 | 0.000236  |
| 441 | 0.000375 | 0.00114 | 0.000244  |
| 440 | 0.000395 | 0.00114 | 0.000248  |
| 439 | 0.000385 | 0.00114 | 0.00027   |
| 438 | 0.000384 | 0.00114 | 0.000291  |
| 437 | 0.000418 | 0.00113 | 0.000321  |
| 436 | 0.000466 | 0.00112 | 0.000332  |
| 435 | 0.000473 | 0.00108 | 0.000362  |
| 434 | 0.000478 | 0.00107 | 0.000384  |
| 433 | 0.00046  | 0.00109 | 0.000414  |
| 432 | 0.000482 | 0.0011  | 0.000425  |
| 431 | 0.000454 | 0.0011  | 0.000446  |
| 430 | 0.000429 | 0.00109 | 0.000474  |
| 429 | 0.000417 | 0.00109 | 0.000505  |

|     |          |          |          |
|-----|----------|----------|----------|
| 428 | 0.000455 | 0.00108  | 0.000551 |
| 427 | 0.000457 | 0.00109  | 0.000571 |
| 426 | 0.000467 | 0.00109  | 0.000615 |
| 425 | 0.000518 | 0.00108  | 0.000639 |
| 424 | 0.00053  | 0.0011   | 0.000686 |
| 423 | 0.000536 | 0.0011   | 0.000754 |
| 422 | 0.000486 | 0.0011   | 0.00087  |
| 421 | 0.000462 | 0.00109  | 0.001    |
| 420 | 0.000473 | 0.00135  | 0.000928 |
| 419 | 0.000422 | 0.00135  | 0.00106  |
| 418 | 0.000429 | 0.00132  | 0.00123  |
| 417 | 0.000391 | 0.00127  | 0.00144  |
| 416 | 0.000404 | 0.00123  | 0.00168  |
| 415 | 0.000411 | 0.0012   | 0.00197  |
| 414 | 0.000379 | 0.00117  | 0.00233  |
| 413 | 0.000357 | 0.00115  | 0.00275  |
| 412 | 0.000355 | 0.00112  | 0.00326  |
| 411 | 0.000406 | 0.00109  | 0.00387  |
| 410 | 0.000448 | 0.00103  | 0.00458  |
| 409 | 0.000466 | 0.00099  | 0.00543  |
| 408 | 0.00045  | 0.000966 | 0.00642  |
| 407 | 0.00043  | 0.000958 | 0.00761  |
| 406 | 0.000452 | 0.000947 | 0.00898  |
| 405 | 0.000457 | 0.000891 | 0.0106   |
| 404 | 0.00047  | 0.000874 | 0.0125   |
| 403 | 0.000492 | 0.000853 | 0.0146   |
| 402 | 0.000549 | 0.000854 | 0.017    |
| 401 | 0.000566 | 0.000873 | 0.0198   |
| 400 | 0.0006   | 0.000857 | 0.0229   |
| 399 | 0.000643 | 0.000859 | 0.0264   |
| 398 | 0.000733 | 0.000858 | 0.0303   |
| 397 | 0.000804 | 0.000857 | 0.0345   |
| 396 | 0.000887 | 0.000872 | 0.0392   |
| 395 | 0.000929 | 0.000883 | 0.0443   |
| 394 | 0.000956 | 0.000916 | 0.0497   |
| 393 | 0.000921 | 0.000929 | 0.0556   |
| 392 | 0.000901 | 0.000988 | 0.0618   |

|     |          |         |        |
|-----|----------|---------|--------|
| 391 | 0.000851 | 0.00104 | 0.0683 |
| 390 | 0.000806 | 0.00109 | 0.075  |
| 389 | 0.000692 | 0.00116 | 0.0819 |
| 388 | 0.000656 | 0.00123 | 0.0889 |
| 387 | 0.000594 | 0.00132 | 0.0958 |
| 386 | 0.000561 | 0.00146 | 0.103  |
| 385 | 0.00044  | 0.00159 | 0.109  |
| 384 | 0.000361 | 0.00181 | 0.116  |
| 383 | 0.000305 | 0.00207 | 0.122  |
| 382 | 0.000293 | 0.00239 | 0.127  |
| 381 | 0.000329 | 0.00277 | 0.132  |
| 380 | 0.000333 | 0.00326 | 0.137  |
| 379 | 0.000336 | 0.00388 | 0.142  |
| 378 | 0.000319 | 0.00464 | 0.145  |
| 377 | 0.000297 | 0.00558 | 0.149  |
| 376 | 0.000314 | 0.00674 | 0.152  |
| 375 | 0.000291 | 0.00823 | 0.155  |
| 374 | 0.000282 | 0.0101  | 0.157  |
| 373 | 0.000281 | 0.0123  | 0.16   |
| 372 | 0.000288 | 0.0151  | 0.162  |
| 371 | 0.000322 | 0.0185  | 0.164  |
| 370 | 0.00074  | 0.023   | 0.166  |
| 369 | 0.000741 | 0.0278  | 0.167  |
| 368 | 0.000687 | 0.0335  | 0.169  |
| 367 | 0.000712 | 0.0401  | 0.17   |
| 366 | 0.000746 | 0.048   | 0.171  |
| 365 | 0.000799 | 0.057   | 0.171  |
| 364 | 0.000885 | 0.0673  | 0.171  |
| 363 | 0.000874 | 0.0791  | 0.171  |
| 362 | 0.000942 | 0.0921  | 0.17   |
| 361 | 0.000954 | 0.107   | 0.169  |
| 360 | 0.00099  | 0.123   | 0.167  |
| 359 | 0.00102  | 0.14    | 0.164  |
| 358 | 0.00101  | 0.158   | 0.162  |
| 357 | 0.0011   | 0.178   | 0.159  |
| 356 | 0.00118  | 0.198   | 0.156  |
| 355 | 0.00127  | 0.219   | 0.152  |



|     |         |       |        |
|-----|---------|-------|--------|
| 354 | 0.00133 | 0.24  | 0.149  |
| 353 | 0.00137 | 0.261 | 0.145  |
| 352 | 0.00147 | 0.282 | 0.141  |
| 351 | 0.0016  | 0.303 | 0.137  |
| 350 | 0.00179 | 0.323 | 0.134  |
| 349 | 0.00201 | 0.342 | 0.13   |
| 348 | 0.00226 | 0.36  | 0.126  |
| 347 | 0.00254 | 0.378 | 0.122  |
| 346 | 0.00283 | 0.395 | 0.118  |
| 345 | 0.00324 | 0.41  | 0.114  |
| 344 | 0.00376 | 0.425 | 0.11   |
| 343 | 0.00446 | 0.438 | 0.106  |
| 342 | 0.00517 | 0.45  | 0.101  |
| 341 | 0.00612 | 0.462 | 0.0973 |
| 340 | 0.0076  | 0.471 | 0.0931 |
| 339 | 0.00917 | 0.48  | 0.0889 |
| 338 | 0.0112  | 0.487 | 0.0848 |
| 337 | 0.0138  | 0.493 | 0.0809 |
| 336 | 0.0171  | 0.497 | 0.0771 |
| 335 | 0.0213  | 0.5   | 0.0734 |
| 334 | 0.0266  | 0.502 | 0.0697 |
| 333 | 0.0331  | 0.502 | 0.0662 |
| 332 | 0.041   | 0.501 | 0.0628 |
| 331 | 0.0505  | 0.498 | 0.0595 |
| 330 | 0.0618  | 0.493 | 0.0563 |
| 329 | 0.0749  | 0.487 | 0.0533 |
| 328 | 0.0901  | 0.48  | 0.0504 |
| 327 | 0.107   | 0.472 | 0.0476 |
| 326 | 0.127   | 0.462 | 0.0449 |
| 325 | 0.148   | 0.451 | 0.0424 |
| 324 | 0.171   | 0.44  | 0.04   |
| 323 | 0.196   | 0.428 | 0.0377 |
| 322 | 0.222   | 0.415 | 0.0356 |
| 321 | 0.249   | 0.402 | 0.0335 |
| 320 | 0.277   | 0.388 | 0.0317 |
| 319 | 0.304   | 0.374 | 0.0299 |
| 318 | 0.33    | 0.359 | 0.0283 |

|     |       |        |        |
|-----|-------|--------|--------|
| 317 | 0.355 | 0.345  | 0.0268 |
| 316 | 0.378 | 0.33   | 0.0254 |
| 315 | 0.399 | 0.315  | 0.0243 |
| 314 | 0.417 | 0.3    | 0.0234 |
| 313 | 0.434 | 0.285  | 0.0227 |
| 312 | 0.448 | 0.27   | 0.0223 |
| 311 | 0.461 | 0.256  | 0.0222 |
| 310 | 0.473 | 0.242  | 0.0228 |
| 309 | 0.482 | 0.228  | 0.0243 |
| 308 | 0.49  | 0.214  | 0.0271 |
| 307 | 0.496 | 0.201  | 0.032  |
| 306 | 0.499 | 0.189  | 0.04   |
| 305 | 0.499 | 0.176  | 0.0523 |
| 304 | 0.497 | 0.165  | 0.0705 |
| 303 | 0.493 | 0.153  | 0.0961 |
| 302 | 0.486 | 0.143  | 0.13   |
| 301 | 0.477 | 0.132  | 0.172  |
| 300 | 0.467 | 0.123  | 0.22   |
| 299 | 0.455 | 0.113  | 0.268  |
| 298 | 0.442 | 0.105  | 0.31   |
| 297 | 0.428 | 0.0962 | 0.336  |
| 296 | 0.413 | 0.0884 | 0.344  |
| 295 | 0.397 | 0.081  | 0.339  |
| 294 | 0.38  | 0.0741 | 0.331  |
| 293 | 0.362 | 0.0677 | 0.326  |
| 292 | 0.344 | 0.0616 | 0.33   |
| 291 | 0.326 | 0.056  | 0.344  |
| 290 | 0.307 | 0.0508 | 0.368  |
| 289 | 0.289 | 0.046  | 0.402  |
| 288 | 0.27  | 0.0415 | 0.439  |
| 287 | 0.252 | 0.0375 | 0.473  |
| 286 | 0.235 | 0.0337 | 0.495  |
| 285 | 0.218 | 0.0303 | 0.501  |
| 284 | 0.202 | 0.0271 | 0.489  |
| 283 | 0.186 | 0.0242 | 0.467  |
| 282 | 0.171 | 0.0217 | 0.44   |
| 281 | 0.157 | 0.0193 | 0.416  |

|     |        |         |       |
|-----|--------|---------|-------|
| 280 | 0.143  | 0.0172  | 0.398 |
| 279 | 0.13   | 0.0154  | 0.389 |
| 278 | 0.119  | 0.0137  | 0.386 |
| 277 | 0.108  | 0.0123  | 0.389 |
| 276 | 0.0974 | 0.0111  | 0.392 |
| 275 | 0.088  | 0.00999 | 0.391 |
| 274 | 0.0794 | 0.00909 | 0.384 |
| 273 | 0.0714 | 0.0084  | 0.37  |
| 272 | 0.0642 | 0.00787 | 0.351 |
| 271 | 0.0578 | 0.0075  | 0.331 |
| 270 | 0.0521 | 0.00732 | 0.312 |
| 269 | 0.047  | 0.0073  | 0.297 |
| 268 | 0.0426 | 0.00745 | 0.286 |
| 267 | 0.0388 | 0.0077  | 0.28  |
| 266 | 0.0356 | 0.00819 | 0.278 |
| 265 | 0.033  | 0.00894 | 0.278 |
| 264 | 0.0311 | 0.00997 | 0.281 |
| 263 | 0.0297 | 0.0113  | 0.289 |
| 262 | 0.0289 | 0.0131  | 0.305 |
| 261 | 0.0288 | 0.0153  | 0.335 |
| 260 | 0.0293 | 0.0181  | 0.386 |
| 259 | 0.0306 | 0.0218  | 0.464 |
| 258 | 0.0326 | 0.0265  | 0.572 |
| 257 | 0.0357 | 0.0328  | 0.713 |
| 256 | 0.0399 | 0.0413  | 0.888 |
| 255 | 0.0458 | 0.0527  | 1.09  |
| 254 | 0.0538 | 0.0684  | 1.3   |
| 253 | 0.0648 | 0.0895  | 1.48  |
| 252 | 0.0796 | 0.117   | 1.62  |
| 251 | 0.0996 | 0.153   | 1.72  |
| 250 | 0.127  | 0.198   | 1.8   |
| 249 | 0.163  | 0.25    | 1.86  |
| 248 | 0.212  | 0.309   | 1.9   |
| 247 | 0.275  | 0.371   | 1.94  |
| 246 | 0.354  | 0.434   | 1.97  |
| 245 | 0.448  | 0.495   | 1.99  |
| 244 | 0.553  | 0.552   | 2     |

|     |       |       |       |
|-----|-------|-------|-------|
| 243 | 0.663 | 0.603 | 2.01  |
| 242 | 0.768 | 0.647 | 2.02  |
| 241 | 0.855 | 0.683 | 2.03  |
| 240 | 0.919 | 0.711 | 2.04  |
| 239 | 0.961 | 0.73  | 2.05  |
| 238 | 0.983 | 0.74  | 2.06  |
| 237 | 0.993 | 0.743 | 2.06  |
| 236 | 0.99  | 0.741 | 2.06  |
| 235 | 0.977 | 0.733 | 2.07  |
| 234 | 0.954 | 0.724 | 2.07  |
| 233 | 0.923 | 0.713 | 2.07  |
| 232 | 0.885 | 0.704 | 2.07  |
| 231 | 0.844 | 0.697 | 2.06  |
| 230 | 0.803 | 0.696 | 2.06  |
| 229 | 0.764 | 0.705 | 2.05  |
| 228 | 0.728 | 0.728 | 2.03  |
| 227 | 0.694 | 0.771 | 2.01  |
| 226 | 0.661 | 0.841 | 1.97  |
| 225 | 0.632 | 0.944 | 1.93  |
| 224 | 0.605 | 1.09  | 1.87  |
| 223 | 0.582 | 1.27  | 1.82  |
| 222 | 0.563 | 1.49  | 1.77  |
| 221 | 0.55  | 1.74  | 1.71  |
| 220 | 0.545 | 1.98  | 1.65  |
| 219 | 0.552 | 2.18  | 1.58  |
| 218 | 0.579 | 2.31  | 1.49  |
| 217 | 0.635 | 2.38  | 1.41  |
| 216 | 0.736 | 2.41  | 1.33  |
| 215 | 0.897 | 2.43  | 1.26  |
| 214 | 1.13  | 2.43  | 1.19  |
| 213 | 1.44  | 2.41  | 1.12  |
| 212 | 1.84  | 2.39  | 1.06  |
| 211 | 2.27  | 2.36  | 1     |
| 210 | 2.62  | 2.31  | 0.944 |
| 209 | 2.79  | 2.25  | 0.893 |
| 208 | 2.85  | 2.18  | 0.849 |
| 207 | 2.87  | 2.11  | 0.811 |

|     |      |      |       |
|-----|------|------|-------|
| 206 | 2.88 | 2.03 | 0.777 |
| 205 | 2.88 | 1.95 | 0.745 |
| 204 | 2.86 | 1.88 | 0.715 |
| 203 | 2.84 | 1.81 | 0.687 |
| 202 | 2.8  | 1.75 | 0.66  |
| 201 | 2.75 | 1.69 | 0.634 |
| 200 | 2.66 | 1.65 | 0.611 |

Table 5. Experimental data of the IPCE spectra in Fig. 3(c).

| Wavelength (nm) | IPCE_TiO <sub>2</sub> -SA (%) | IPCE_TiO <sub>2</sub> -SAOMe (%) | IPCE_TiO <sub>2</sub> -HNA (%) |
|-----------------|-------------------------------|----------------------------------|--------------------------------|
| 800             | 0.02038                       | -0.05028                         | -0.02871                       |
| 790             | 0.02077                       | -0.05872                         | -0.03401                       |
| 780             | 0.0243                        | -0.05945                         | -0.0338                        |
| 770             | 0.02976                       | -0.05672                         | -0.03042                       |
| 760             | 0.0416                        | -0.05569                         | -0.02744                       |
| 750             | 0.04836                       | -0.05586                         | -0.022                         |
| 740             | 0.05166                       | -0.05411                         | -0.01626                       |
| 730             | 0.05568                       | -0.04766                         | -0.006832                      |
| 720             | 0.06338                       | -0.03649                         | 0.005557                       |
| 710             | 0.06551                       | -0.01866                         | 0.02254                        |
| 700             | 0.06674                       | 0.01387                          | 0.05145                        |
| 690             | 0.06997                       | 0.06634                          | 0.1                            |
| 680             | 0.07347                       | 0.1426                           | 0.1675                         |
| 670             | 0.2046                        | 0.5462                           | 0.4512                         |
| 660             | 0.1443                        | 0.5266                           | 0.452                          |
| 650             | 0.1166                        | 0.739                            | 0.6249                         |
| 640             | 0.1043                        | 1.084                            | 0.8865                         |
| 630             | 0.09511                       | 1.567                            | 1.25                           |
| 620             | 0.105                         | 2.226                            | 1.752                          |
| 610             | 0.1167                        | 3.097                            | 2.423                          |
| 600             | 0.1342                        | 4.255                            | 3.346                          |
| 590             | 0.1528                        | 5.843                            | 4.574                          |
| 580             | 0.19                          | 7.56                             | 6.068                          |
| 570             | 0.2464                        | 9.817                            | 8.001                          |
| 560             | 0.3613                        | 12.63                            | 10.45                          |
| 550             | 0.5656                        | 15.89                            | 13.33                          |
| 540             | 0.9585                        | 19.64                            | 16.74                          |
| 530             | 1.547                         | 23.88                            | 20.6                           |
| 520             | 2.507                         | 28.68                            | 24.99                          |
| 510             | 3.952                         | 33.83                            | 29.74                          |
| 500             | 6.135                         | 39.1                             | 34.61                          |
| 490             | 8.595                         | 44.02                            | 39.4                           |
| 480             | 11.76                         | 49.04                            | 43.63                          |
| 470             | 15.17                         | 52.43                            | 47.29                          |
| 460             | 19                            | 55.93                            | 50.58                          |

|     |       |       |       |
|-----|-------|-------|-------|
| 450 | 23.41 | 59.23 | 53.71 |
| 440 | 28.11 | 62.42 | 56.54 |
| 430 | 32.34 | 63.9  | 58.78 |
| 420 | 35.7  | 64.76 | 60.57 |
| 410 | 37.79 | 64.35 | 60.45 |
| 400 | 38.84 | 63.1  | 60.05 |
| 390 | 39.46 | 61.57 | 59.38 |
| 380 | 41.75 | 57.8  | 56.98 |
| 370 | 43.03 | 55.98 | 55.66 |
| 360 | 46.83 | 56.88 | 56.94 |
| 350 | 49.3  | 56.11 | 57.2  |
| 340 | 46.7  | 49.91 | 52.38 |
| 330 | 38.95 | 38.72 | 42.13 |
| 320 | 27.67 | 25.12 | 27.72 |
| 310 | 17.25 | 13.06 | 13.56 |
| 300 | 10.37 | 4.956 | 3.668 |

Table 6. Experimental data of the IPCE spectra in Fig. 4.

| Wavelength (nm) | IPCE_TiO <sub>2</sub> -PL (%) | IPCE_TiO <sub>2</sub> -PLOMe (%) | IPCE_TiO <sub>2</sub> -PLNMe <sub>2</sub> (%) | IPCE_TiO <sub>2</sub> -BANMe <sub>2</sub> (%) |
|-----------------|-------------------------------|----------------------------------|-----------------------------------------------|-----------------------------------------------|
| 800             | -0.005852                     | -0.0358                          | -0.09288                                      | -0.02952                                      |
| 790             | -0.007639                     | -0.04024                         | -0.108                                        | -0.03343                                      |
| 780             | -0.007394                     | -0.038                           | -0.1035                                       | -0.03106                                      |
| 770             | -0.009049                     | -0.03708                         | -0.09483                                      | -0.02536                                      |
| 760             | -0.01005                      | -0.03829                         | -0.09707                                      | -0.01848                                      |
| 750             | -0.00941                      | -0.04007                         | -0.1026                                       | -0.007625                                     |
| 740             | -0.009491                     | -0.04173                         | -0.106                                        | 0.01184                                       |
| 730             | -0.008691                     | -0.0423                          | -0.1065                                       | 0.04438                                       |
| 720             | -0.005616                     | -0.04246                         | -0.1096                                       | 0.09353                                       |
| 710             | -0.005123                     | -0.04159                         | -0.1108                                       | 0.1676                                        |
| 700             | -0.003454                     | -0.0386                          | -0.1046                                       | 0.2813                                        |
| 690             | -0.002075                     | -0.03511                         | -0.09464                                      | 0.4533                                        |
| 680             | -0.00114                      | -0.03233                         | -0.08896                                      | 0.6668                                        |
| 670             | 0.08621                       | 0.002396                         | -0.08837                                      | 1.067                                         |
| 660             | 0.0359                        | -0.004789                        | -0.07778                                      | 1.499                                         |
| 650             | 0.02953                       | 0.004124                         | -0.06206                                      | 2.116                                         |
| 640             | 0.03068                       | 0.02257                          | -0.04259                                      | 2.95                                          |
| 630             | 0.03558                       | 0.05057                          | -0.02009                                      | 4.054                                         |
| 620             | 0.0443                        | 0.09194                          | 0.005951                                      | 5.443                                         |
| 610             | 0.05684                       | 0.1529                           | 0.03668                                       | 7.207                                         |
| 600             | 0.07438                       | 0.2434                           | 0.0778                                        | 9.461                                         |
| 590             | 0.09828                       | 0.3734                           | 0.1295                                        | 12.22                                         |
| 580             | 0.1302                        | 0.5539                           | 0.1934                                        | 15.52                                         |
| 570             | 0.1733                        | 0.8074                           | 0.2693                                        | 19.42                                         |
| 560             | 0.2316                        | 1.118                            | 0.3607                                        | 23.93                                         |
| 550             | 0.3061                        | 1.518                            | 0.4628                                        | 28.78                                         |
| 540             | 0.4062                        | 2.011                            | 0.5781                                        | 33.99                                         |
| 530             | 0.5311                        | 2.61                             | 0.7049                                        | 39.61                                         |
| 520             | 0.697                         | 3.357                            | 0.8479                                        | 44.79                                         |
| 510             | 0.9096                        | 4.267                            | 1.005                                         | 50.15                                         |
| 500             | 1.174                         | 5.292                            | 1.168                                         | 55.22                                         |
| 490             | 1.48                          | 6.407                            | 1.323                                         | 59.33                                         |
| 480             | 1.835                         | 7.571                            | 1.458                                         | 62.64                                         |
| 470             | 2.219                         | 8.711                            | 1.574                                         | 65.01                                         |
| 460             | 2.679                         | 9.909                            | 1.675                                         | 66.74                                         |



|     |       |       |        |       |
|-----|-------|-------|--------|-------|
| 450 | 3.274 | 11.26 | 1.79   | 68.39 |
| 440 | 4.029 | 12.76 | 1.938  | 69.59 |
| 430 | 4.876 | 14.18 | 2.105  | 70.08 |
| 420 | 5.776 | 15.41 | 2.288  | 69.92 |
| 410 | 6.68  | 16.32 | 2.47   | 68.93 |
| 400 | 7.818 | 17.1  | 2.644  | 67.76 |
| 390 | 9.847 | 18.08 | 2.808  | 65.65 |
| 380 | 21.89 | 22.73 | 4.039  | 62.95 |
| 370 | 32.11 | 27.82 | 5.988  | 60.53 |
| 360 | 47.59 | 35.07 | 9.58   | 60.37 |
| 350 | 60.38 | 40.86 | 13.76  | 58.33 |
| 340 | 63.1  | 41.06 | 16.51  | 50.95 |
| 330 | 54.29 | 34.69 | 15.64  | 38.95 |
| 320 | 37.64 | 23.17 | 10.78  | 24.4  |
| 310 | 18.99 | 11.1  | 3.991  | 11.41 |
| 300 | 6.215 | 2.224 | -1.809 | 2.691 |
